# Supplementary material for: In silico prediction of HIV-1-host molecular interactions and their directionality
Source: PubMed Central journal article supplement (PMC8856524; doi:10.1371/journal.pcbi.1009720), 2022-02-08
Supplement: pcbi.1009720.s003.pdf [file pcbi.1009720.s003.pdf]

### **S3 Appendix. Characterisation of features in annotation and network profiles**

The Gene Ontology is a resource of knowledge unifying the representation of gene and gene product attributes. It is reported to be one of the strongest indicators of interacting proteins [1]. Compared with the annotation profile of non-VIPs, we found some GO terms, e.g., cytokine-mediated signalling pathway (GO:0019221), protein binding (GO:0005515), and nucleoplasm (GO:0005654) were highly enriched in the GO profile of VIPs. In order to reduce the dependency of our knowledge models on the annotated GO profile, we mapped the collected GO terms through the derivation tree and cataloged them into 66 domains representing child terms of biological process, molecular function and cellular component (**S3 Data**). Based on these ‘new’ GO profiles, we found an estimated 90% of VIPs were involved in the cellular process while the ratio reduced to two-thirds in non-VIPs (Pearson's Chi-squared test:  $P=1.9E-123$ ) (**Fig I**). The difference of binding activities was also observed between VIPs and non-VIPs ( $P=1.9E-84$ ) (**Fig J**). This is not surprising since the majority of VIPs were placed in key positions with a high degree or betweenness centrality within the human interactome (**S3 Data**). Additionally, we also found some clues in the catalogued GO profiles, which might help for the classification of VIPs with different directionality. For instance, approximately 77% of ‘bidirectional’ VIPs could raise a response to stimulus but the percentage for ‘forward’ VIPs, ‘backward’ VIPs, and non-VIPs only reached 47%, 29% and 20%, respectively (**Fig I, S3 Data**). ‘Backward’ or ‘bidirectional’ VIPs were more likely to be found in organelles as opposed to ‘forward’ VIPs and non-VIPs ( $P=7.3E-5$ ,  $1.6E-7$ ,  $2.0E-70$ , respectively) (**Fig K, S3 Data**).

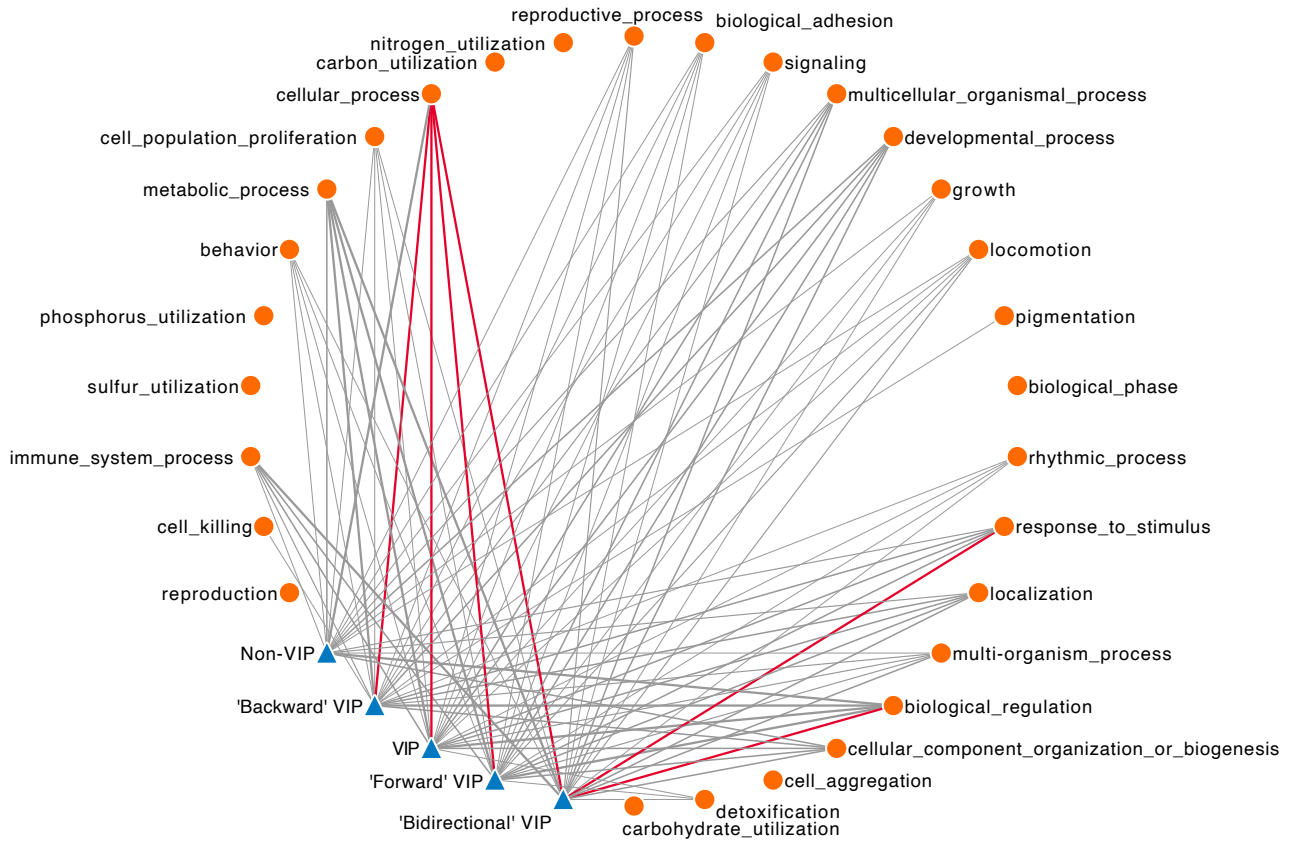

**Fig I. GO annotation status of different VIPs under the catalogue of biological process.** Bolder lines indicate stronger relationship between human proteins and GO child terms. Red lines indicate a GO child term is related to more than 75% of human proteins. Detailed data about the GO involvement in different human proteins are provided in **S3 Data**. Abbreviations: HIV-1, human immunodeficiency virus type 1; VIP, HIV-1 interacting human protein; GO, gene ontology.

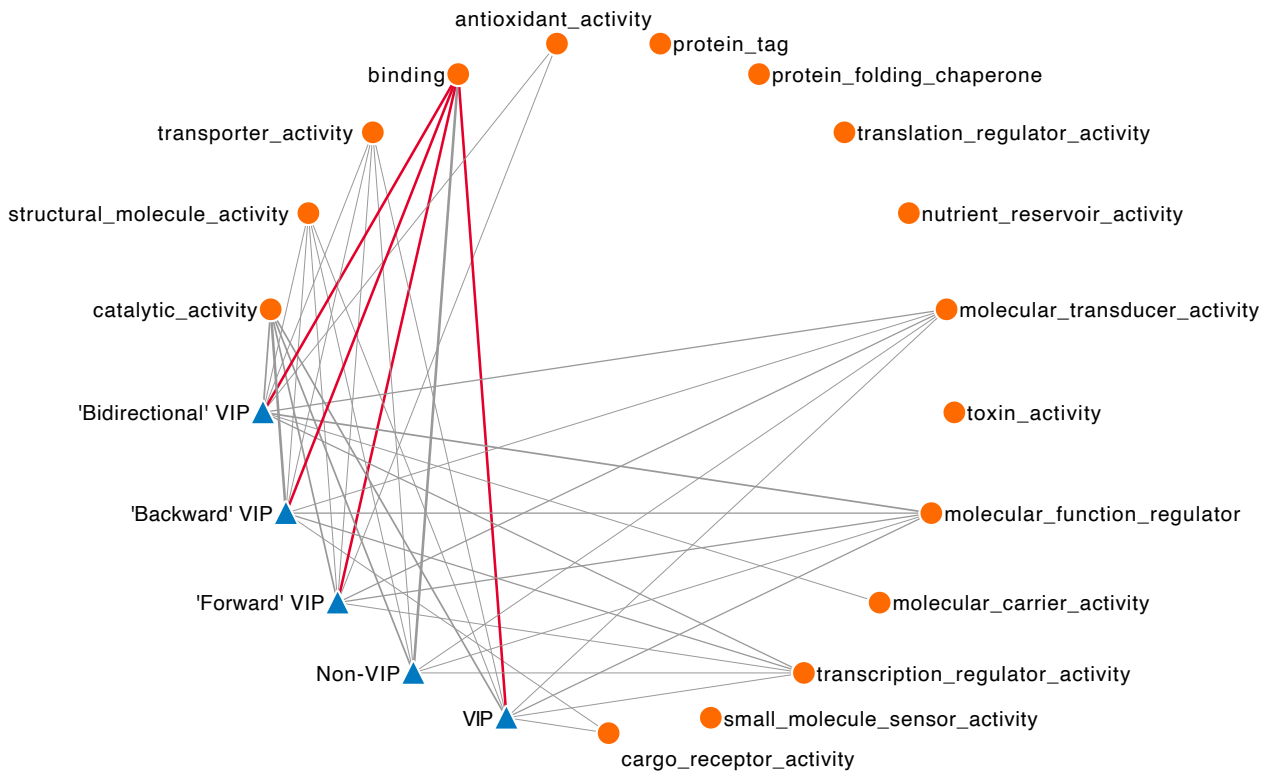

**Fig J. GO annotation status of different VIPs under the catalogue of molecular function.** Bolder lines indicate stronger relationship between human proteins and GO child terms. Red lines indicate a GO child term is related to more than 75% of human proteins. Detailed data about the GO involvement in different human proteins are provided in **S3 Data**. Abbreviations: HIV-1, human immunodeficiency virus type 1; VIP, HIV-1 interacting human protein; GO, gene ontology.

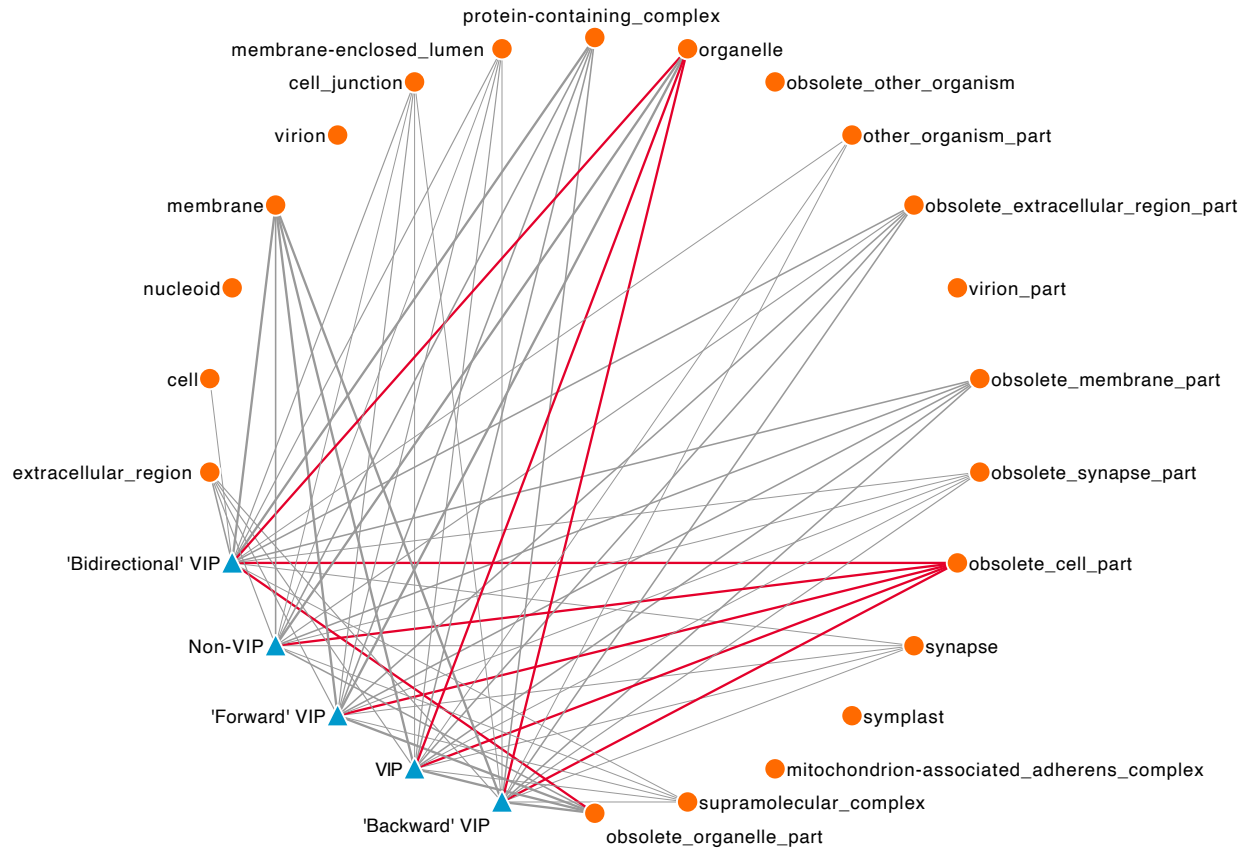

**Fig K. GO annotation status of different VIPs under the catalogue of cellular component.** Bolder lines indicate stronger relationship between human proteins and GO child terms. Red lines indicate a GO child term is related to more than 80% of human proteins. Detailed data about the GO involvement in different human proteins are provided in **S3 Data**. Abbreviations: HIV-1, human immunodeficiency virus type 1; VIP, HIV-1 interacting human protein; GO, gene ontology.

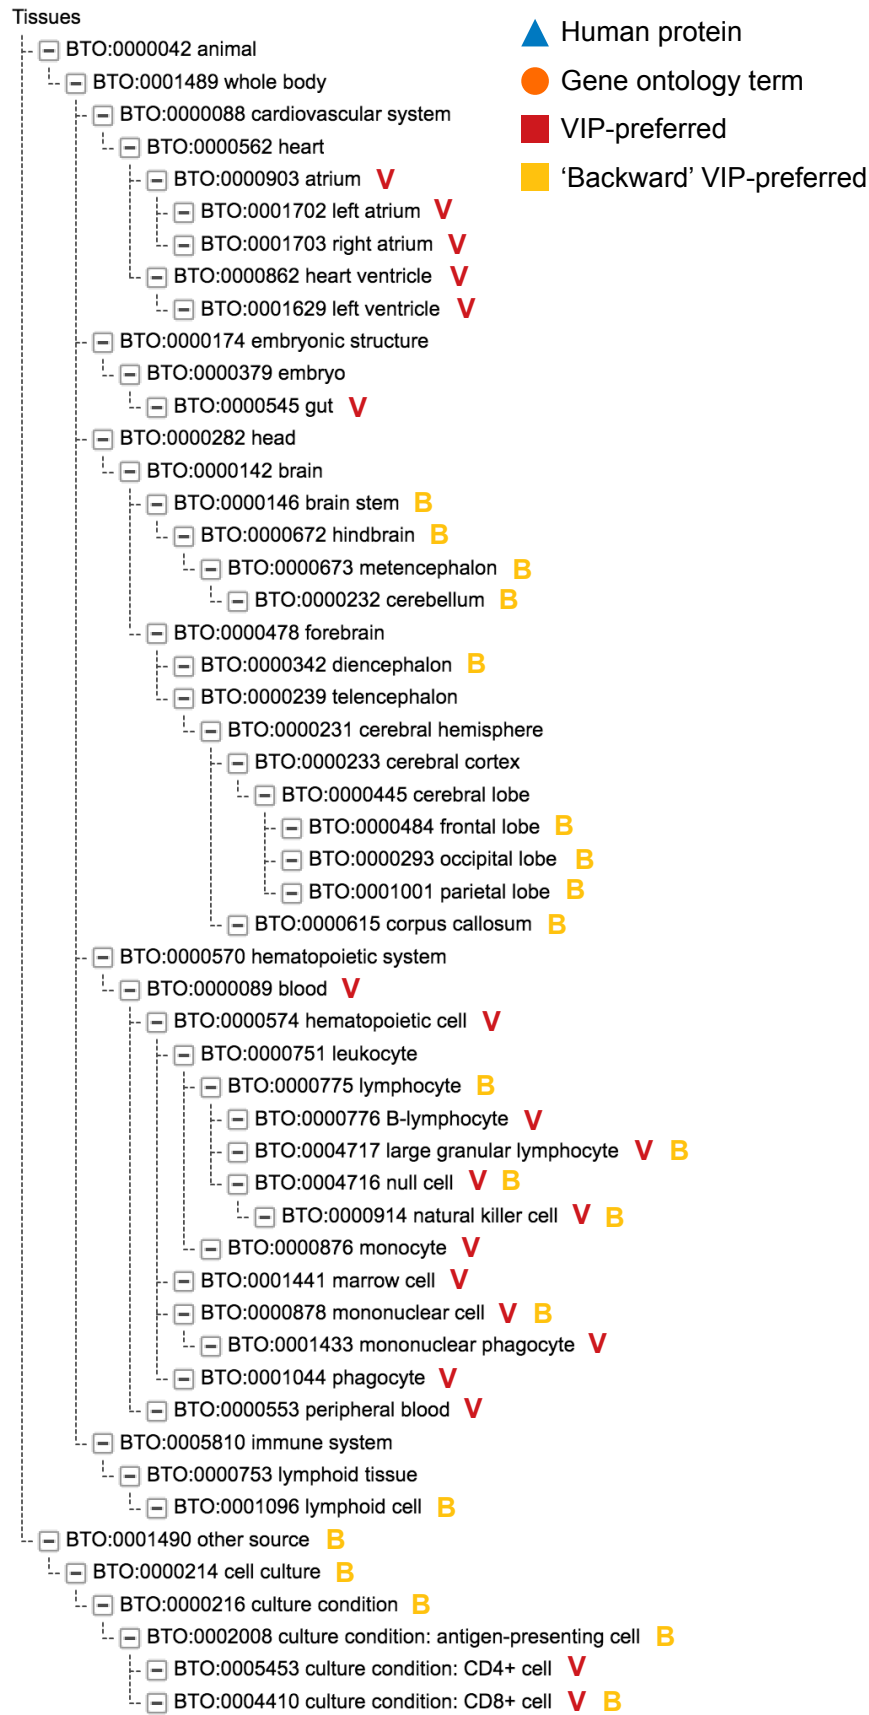

**Fig L. Top 20 tissues preferred by VIPs and ‘backward’ VIPs.** Detailed data about the top 20 tissue tropisms are provided in **S3 Data**. Abbreviations: HIV-1, human immunodeficiency virus type 1; VIP, HIV-1 interacting human protein.

From the perspective of tissue tropisms, VIPs preferred heart- or hematopoietic system-related tissue. The most significant difference between VIP and non-VIP was found in their association with monocyte (nongranular phagocytic leukocyte) where relatively long-lived macrophages were derived (**Fig L, S3 Data**) ( $P=1.7E-137$ ) [2]. The same differences were found in phagocyte that engulfs foreign material [3] and immature blood cells that develop in the bone marrow [4]. In the tissue group of antigen-presenting cells, CD4<sup>+</sup> and CD8<sup>+</sup> cells were favoured by VIPs, which showed a strong relationship between a virus invading and the immune responses ( $P=5.1E-131$  and  $5.8E-114$ , respectively) [5,6]. Compared with ‘forward’ VIPs, ‘backward’ VIPs were less involved in the hematopoietic system, but they were more expressed in brain-related tissues, such as the brain stem and cerebral lobe (**S3 Data**). Cells originating from stem cells and differentiating in lymphoid tissues were favoured by ‘backward’ VIPs. The relationship between ‘backward’ VIPs and CD8<sup>+</sup> cells were even more obvious, showing a clear relationship linking the virus invading and the host antiviral immune responses [7].

In closing, annotation profiles represented by the GO terms and tissue tropisms differentiated the biological environment between VIPs and non-VIPs. Some preferences of VIPs such as more involvement in cellular binding activities were also reflected in the human interactome.

## References

1. Maetschke SR, Simonsen M, Davis MJ, Ragan MA. Gene Ontology-driven inference of protein–protein interactions using inducers. *Bioinformatics*. 2012; 28(1): 69-75. <https://doi.org/10.1093/bioinformatics/btr610> PMID: 22057159
2. Wang X, Ye L, Hou W, Zhou Y, Wang Y-J, Metzger DS, et al. Cellular microRNA expression correlates with susceptibility of monocytes/macrophages to HIV-1 infection. *Blood*. 2009; 113(3): 671-674. <https://doi.org/10.1182/blood-2008-09-175000> PMID: 19015395
3. Persidsky Y, Gendelman HE. Mononuclear phagocyte immunity and the neuropathogenesis of HIV-1 infection. *J Leukoc Biol*. 2003; 74(5): 691-701. <https://doi.org/10.1189/jlb.0503205> PMID: 14595004

4. Alexaki A, Wigdahl B. HIV-1 infection of bone marrow hematopoietic progenitor cells and their role in trafficking and viral dissemination. *PLoS Pathog.* 2008; 4(12): e1000215. <https://doi.org/10.1371/journal.ppat.1000215> PMID: 19112504
5. Caby F. CD4+/CD8+ ratio restoration in long-term treated HIV-1-infected individuals. *AIDS.* 2017; 31(12): 1685-1695. <https://doi.org/10.1097/QAD.0000000000001533> PMID: 28700392
6. Boettler T, Spangenberg HC, Neumann-Haefelin C, Panther E, Urbani S, Ferrari C, et al. T cells with a CD4+ CD25+ regulatory phenotype suppress in vitro proliferation of virus-specific CD8+ T cells during chronic hepatitis C virus infection. *J Virol.* 2005; 79(12): 7860-7867. <https://doi.org/10.1128/JVI.79.12.7860-7867.2005> PMID: 15919940
7. Puntel M, Barrett R, Sanderson NS, Kroeger KM, Bondale N, Wibowo M, et al. Identification and visualization of CD8+ T cell mediated IFN- $\gamma$  signaling in target cells during an antiviral immune response in the brain. *PLoS One.* 2011; 6(8): e23523. <https://doi.org/10.1371/journal.pone.0023523> PMID: 21897844
