# Supplementary material for: In silico prediction of HIV-1-host molecular interactions and their directionality
Source: PubMed Central journal article supplement (PMC8856524; doi:10.1371/journal.pcbi.1009720), 2022-02-08

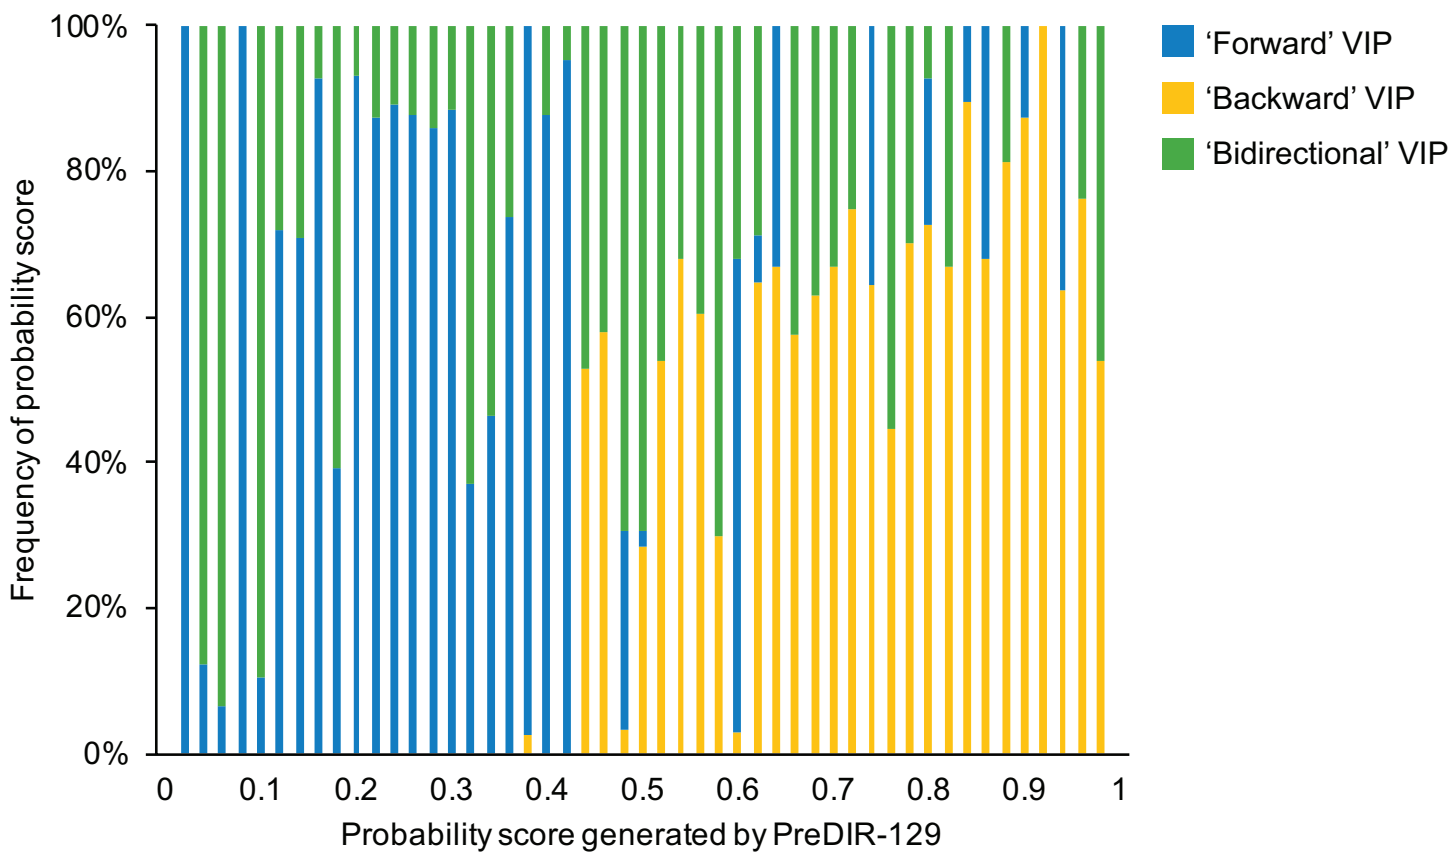

Supplement: pcbi.1009720.s008.pdf [file pcbi.1009720.s008.pdf]
