# Supplementary material for: In silico prediction of HIV-1-host molecular interactions and their directionality
Source: PubMed Central journal article supplement (PMC8856524; doi:10.1371/journal.pcbi.1009720), 2022-02-08
Supplement: pcbi.1009720.s009.pdf [file pcbi.1009720.s009.pdf]

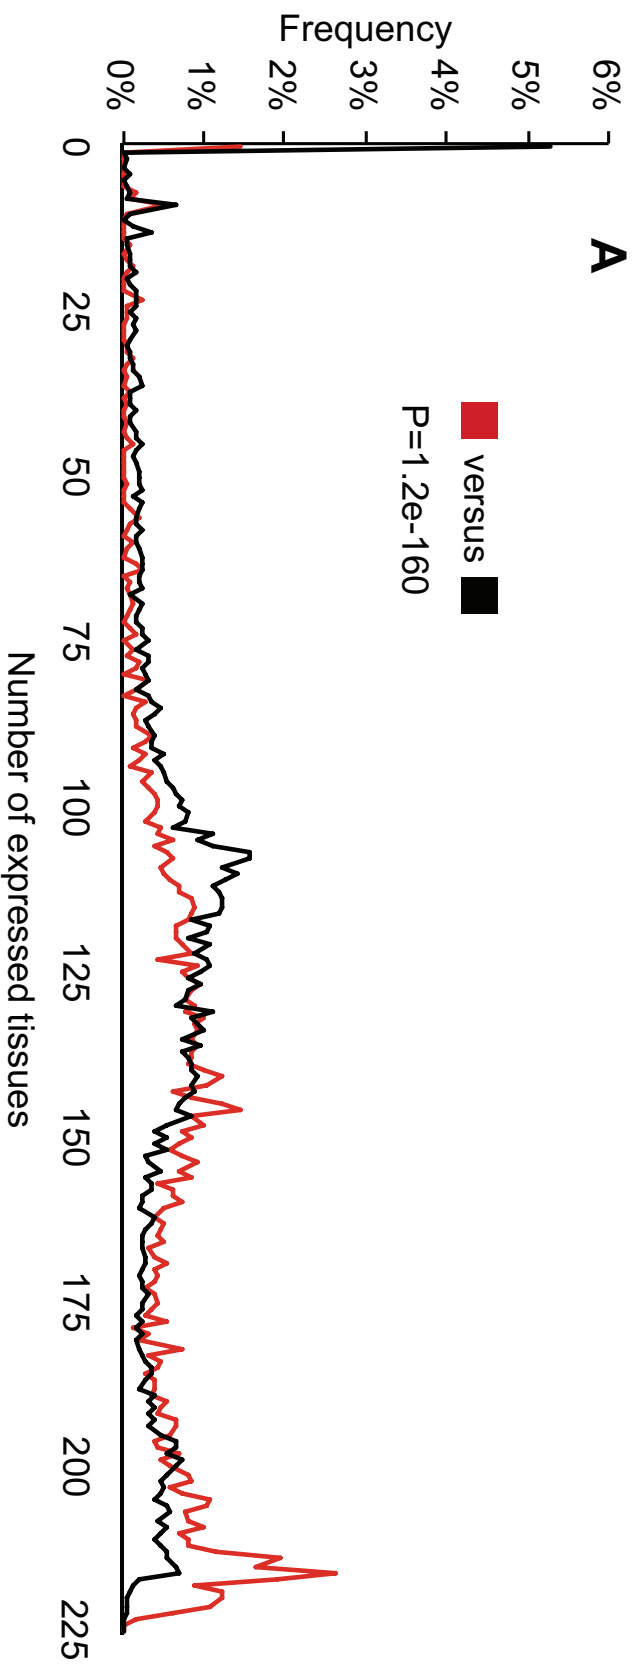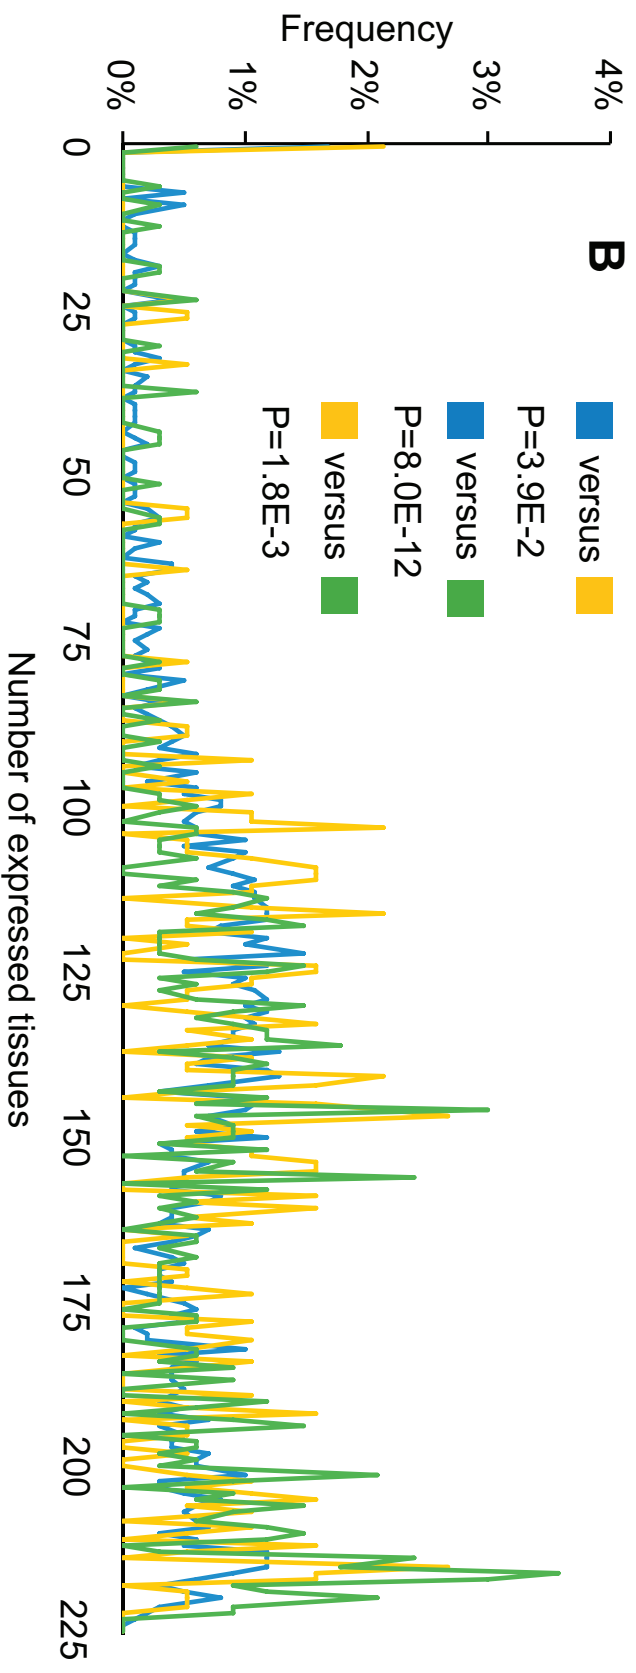

■ VIP

■ Non-VIP

■ 'Forward' VIP

■ 'Backward' VIP

■ 'Bidirectional' VIP
