# Supplementary material for: In silico prediction of HIV-1-host molecular interactions and their directionality
Source: PubMed Central journal article supplement (PMC8856524; doi:10.1371/journal.pcbi.1009720), 2022-02-08
Supplement: pcbi.1009720.s010.pdf [file pcbi.1009720.s010.pdf]

**S1 Table. The recommended interaction direction for models using the 129 optimum feature set<sup>f</sup>.**

| Score range        | Direction distribution<br>'backward'/'forward'/'bidirectional' | Recommendation_1 <sup>b,c</sup> | Confidence_1 <sup>a,d</sup> | Recommendation_2       | Confidence_2 <sup>e</sup> |
|--------------------|----------------------------------------------------------------|---------------------------------|-----------------------------|------------------------|---------------------------|
| [0.00-0.02)        | 0.00%/0.00%/0.00%                                              | 'Forward'                       | N/A                         | 'Bidirectional'        | High                      |
| [0.02-0.04)        | 0.00%/0.00%/0.00%                                              | 'Forward'                       | N/A                         | 'Bidirectional'        | High                      |
| <b>[0.04-0.06)</b> | <b>0.00%/2.00%/2.09%</b>                                       | <b>'Bidirectional'</b>          | <b>51%</b>                  | <b>'Forward'</b>       | <b>100.00%</b>            |
| [0.06-0.08)        | 0.67%/2.67%/2.69%                                              | 'Bidirectional'                 | 45%                         | 'Forward'              | 88.93%                    |
| <b>[0.08-0.10)</b> | <b>0.00%/5.33%/1.49%</b>                                       | <b>'Forward'</b>                | <b>78%</b>                  | <b>'Bidirectional'</b> | <b>100.00%</b>            |
| [0.10-0.12)        | 0.67%/2.67%/3.28%                                              | 'Bidirectional'                 | 50%                         | 'Forward'              | 89.92%                    |
| <b>[0.12-0.14)</b> | <b>0.00%/4.67%/2.69%</b>                                       | <b>'Forward'</b>                | <b>63%</b>                  | <b>'Bidirectional'</b> | <b>100.00%</b>            |
| <b>[0.14-0.16)</b> | <b>0.00%/4.00%/3.88%</b>                                       | <b>'Forward'</b>                | <b>51%</b>                  | <b>'Bidirectional'</b> | <b>100.00%</b>            |
| [0.16-0.18)        | 0.67%/5.33%/2.09%                                              | 'Forward'                       | 66%                         | 'Bidirectional'        | 91.76%                    |
| <b>[0.18-0.20)</b> | <b>0.00%/1.33%/2.69%</b>                                       | <b>'Bidirectional'</b>          | <b>67%</b>                  | <b>'Forward'</b>       | <b>100.00%</b>            |
| [0.20-0.22)        | 0.00%/3.33%/3.28%                                              | 'Forward'                       | 50%                         | 'Bidirectional'        | 100.00%                   |
| [0.22-0.24)        | 2.00%/4.00%/3.28%                                              | 'Forward'                       | 43%                         | 'Bidirectional'        | 78.46%                    |
| [0.24-0.26)        | 0.67%/2.00%/1.49%                                              | 'Forward'                       | 48%                         | 'Bidirectional'        | 83.97%                    |
| [0.26-0.28)        | 1.33%/5.33%/3.58%                                              | 'Forward'                       | 52%                         | 'Bidirectional'        | 86.99%                    |
| <b>[0.28-0.30)</b> | <b>0.00%/3.33%/2.69%</b>                                       | <b>'Forward'</b>                | <b>55%</b>                  | <b>'Bidirectional'</b> | <b>100.00%</b>            |
| [0.30-0.32)        | 0.67%/4.67%/1.49%                                              | 'Forward'                       | 68%                         | 'Bidirectional'        | 90.23%                    |
| [0.32-0.34)        | 1.33%/1.33%/3.28%                                              | 'Bidirectional'                 | 55%                         | 'Forward'              | 77.59%                    |
| <b>[0.34-0.36)</b> | <b>0.67%/3.33%/4.48%</b>                                       | <b>'Bidirectional'</b>          | <b>53%</b>                  | <b>'Forward'</b>       | <b>92.14%</b>             |
| [0.36-0.38)        | 0.67%/3.33%/2.69%                                              | 'Forward'                       | 50%                         | 'Bidirectional'        | 90.03%                    |
| [0.38-0.40)        | 2.67%/3.33%/2.09%                                              | 'Forward'                       | 41%                         | 'Backward'             | 74.17%                    |
| [0.40-0.42)        | 1.33%/2.67%/2.09%                                              | 'Forward'                       | 44%                         | 'Bidirectional'        | 78.10%                    |
| <b>[0.42-0.44)</b> | <b>1.33%/3.33%/1.79%</b>                                       | <b>'Forward'</b>                | <b>52%</b>                  | <b>'Bidirectional'</b> | <b>79.35%</b>             |
| [0.44-0.46)        | 2.00%/1.33%/1.49%                                              | 'Backward'                      | 41%                         | 'Bidirectional'        | 72.37%                    |
| [0.46-0.48)        | 2.67%/2.00%/2.09%                                              | 'Backward'                      | 39%                         | 'Bidirectional'        | 70.40%                    |
| <b>[0.48-0.50)</b> | <b>0.67%/1.33%/2.09%</b>                                       | <b>'Bidirectional'</b>          | <b>51%</b>                  | <b>'Forward'</b>       | <b>83.70%</b>             |
| [0.50-0.52)        | 2.67%/2.00%/2.99%                                              | 'Bidirectional'                 | 39%                         | 'Backward'             | 73.86%                    |
| <b>[0.52-0.54)</b> | <b>5.33%/1.33%/3.58%</b>                                       | <b>'Backward'</b>               | <b>52%</b>                  | <b>'Bidirectional'</b> | <b>86.99%</b>             |
| [0.54-0.56)        | 3.33%/2.00%/2.09%                                              | 'Backward'                      | 45%                         | 'Bidirectional'        | 73.06%                    |
| [0.56-0.58)        | 2.67%/2.00%/2.39%                                              | 'Backward'                      | 38%                         | 'Bidirectional'        | 71.65%                    |
| <b>[0.58-0.60)</b> | <b>1.33%/0.00%/2.69%</b>                                       | <b>'Bidirectional'</b>          | <b>67%</b>                  | <b>'Backward'</b>      | <b>100.00%</b>            |
| [0.60-0.62)        | 2.00%/4.00%/3.58%                                              | 'Forward'                       | 42%                         | 'Bidirectional'        | 79.13%                    |
| <b>[0.62-0.64)</b> | <b>2.67%/0.67%/1.79%</b>                                       | <b>'Backward'</b>               | <b>52%</b>                  | <b>'Bidirectional'</b> | <b>86.99%</b>             |
| [0.64-0.66)        | 2.00%/2.00%/1.79%                                              | 'Backward'                      | 35%                         | 'Forward'              | 69.07%                    |
| [0.66-0.68)        | 6.67%/2.00%/2.99%                                              | 'Backward'                      | 57%                         | 'Bidirectional'        | 82.84%                    |
| <b>[0.68-0.70)</b> | <b>6.00%/0.00%/1.19%</b>                                       | <b>'Backward'</b>               | <b>83%</b>                  | <b>'Bidirectional'</b> | <b>100.00%</b>            |
| <b>[0.70-0.72)</b> | <b>1.33%/0.00%/0.60%</b>                                       | <b>'Backward'</b>               | <b>69%</b>                  | <b>'Bidirectional'</b> | <b>100.00%</b>            |
| [0.72-0.74)        | 2.00%/1.33%/1.49%                                              | 'Backward'                      | 41%                         | 'Bidirectional'        | 72.37%                    |
| [0.74-0.76)        | 2.00%/2.00%/0.60%                                              | 'Backward'                      | 44%                         | 'Forward'              | 87.01%                    |
| [0.76-0.78)        | 2.67%/0.67%/2.99%                                              | 'Bidirectional'                 | 47%                         | 'Backward'             | 89.45%                    |
| <b>[0.78-0.80)</b> | <b>3.33%/0.00%/1.79%</b>                                       | <b>'Backward'</b>               | <b>65%</b>                  | <b>'Bidirectional'</b> | <b>100.00%</b>            |
| [0.80-0.82)        | 2.00%/1.33%/0.90%                                              | 'Backward'                      | 47%                         | 'Forward'              | 78.82%                    |
| [0.82-0.84)        | 3.33%/0.67%/1.19%                                              | 'Backward'                      | 64%                         | 'Bidirectional'        | 87.16%                    |
| [0.84-0.86)        | 2.67%/0.67%/0.30%                                              | 'Backward'                      | 73%                         | 'Forward'              | 91.78%                    |
| [0.86-0.88)        | 2.67%/1.33%/0.90%                                              | 'Backward'                      | 54%                         | 'Forward'              | 81.71%                    |

|                    |                          |                   |            |                        |                |
|--------------------|--------------------------|-------------------|------------|------------------------|----------------|
| [0.88-0.90)        | 5.33%/0.67%/1.19%        | 'Backward'        | 74%        | 'Bidirectional'        | 90.73%         |
| [0.90-0.92)        | 3.33%/1.33%/0.90%        | 'Backward'        | 60%        | 'Forward'              | 83.90%         |
| [0.92-0.94)        | 4.67%/0.67%/0.90%        | 'Backward'        | 75%        | 'Bidirectional'        | 89.30%         |
| [0.94-0.96)        | 1.33%/0.67%/0.30%        | 'Backward'        | 58%        | 'Forward'              | 87.01%         |
| <b>[0.96-0.98)</b> | <b>4.00%/0.00%/1.49%</b> | <b>'Backward'</b> | <b>73%</b> | <b>'Bidirectional'</b> | <b>100.00%</b> |
| <b>[0.98-1.00]</b> | <b>4.67%/0.00%/0.60%</b> | <b>'Backward'</b> | <b>89%</b> | <b>'Bidirectional'</b> | <b>100.00%</b> |

a: N/A is placed for the lack of reference proteins with predicted prediction scores located within corresponding ranges;

b: recommendation\_1 is determined according to the dominant class scored within the corresponding range;

c: in case the dominant class is not obvious, we recommend VIPs with prediction score no less than 0.5 to be 'Backward' and those with prediction score less than 0.5 to be 'Forward';

d: confidence\_1 is calculated as the occurrence frequency of dominant class divided by that of all classes;

e: confidence\_2 is calculated as the occurrence frequency of the major two classes divided by that of all classes; we can't provide the exact confidence we have when getting a prediction score lower than 0.04, but the tested HIV-1 interacting human protein are very likely to have a 'Forward' or 'Bidirectional' tag;

f: rows are colored as red when we have confidence\_1 scored higher than 50%; texts in these rows are further bold when confidence\_2 reaches 100%.

**Abbreviations:** HIV-1, human immunodeficiency virus type 1.
